# Supplementary material for: Molecular engineering and structure–property relationship based on D–A chlorophyll derivative and the application in organic solar cells
Source: Royal Society of Chemistry journal article supplement (doi:10.1039/d4cp02154a), 2024-01-01
Supplement: d4cp02154a1.pdf [file d4cp02154a1.pdf]

## Supporting information

# Molecular engineering and structure-property relationship based on D-A chlorophyll derivative and the application in organic solar cells

Kaiyan Zhang<sup>1,2</sup>, Ting Li<sup>1</sup>, Peng Song<sup>3\*</sup>, Fengcai Ma<sup>3</sup>, Yuanzuo Li<sup>1,2\*</sup>

<sup>1</sup> *College of Science, Northeast Forestry University, Harbin 150040, Heilongjiang, China*

<sup>2</sup> *College of Materials Science and Engineering, Northeast Forestry University, Harbin 150040, Heilongjiang, China*

<sup>3</sup> *Department of Physics, Liaoning University, Shenyang 110036, Liaoning, China*

---

\*Corresponding author:

E-mail Address: yzli@nefu.edu.cn; Songpeng@lnu.edu.cn; liyuanzuo5203@126.com

## Section S.1. Computational details

### S.1.1. Electrochemical parameters

Some important electrochemical parameters can be calculated by following formula details, including ionization potential ( $IP$ ), electron affinity ( $EA$ ), electrophilicity index ( $\omega$ ), electronic acceptance ability ( $\omega^+$ ), absolute hardness ( $\eta$ ) and reorganization energy.

$IP$  and  $EA$  are directly related to the optimization energy of ionic state structure and ground state structure [1]:

$$IP = E(N-1) - E(N) \quad (S1)$$

$$EA = E(N) - E(N+1) \quad (S2)$$

Where  $E(N)$  is the energy of optimized ground state structure,  $E(N-1)$  is the energy of optimized cationic structure, and  $E(N+1)$  is the energy of optimized anionic structure.

Absolute hardness ( $\eta$ ) is one of the critical parameters for evaluating the stability of organic molecules, which can be expressed by the following equation [2]:

$$\eta = \frac{IP - EA}{2} \quad (S3)$$

The electrophilic index  $\omega$  is an important index to evaluate the electrophilic ability of molecules. A smaller  $\omega$  indicates that electrons have good electron donating ability, and  $\omega^+$  indicates the electron receiving ability, which is used to characterize the size of the molecule's ability to acquire electrons. It can be calculated by the following formula[3]:

$$\omega = \frac{(IP + EA)^2}{4(IP - EA)} \quad (S4)$$

$$\omega^+ = \frac{(IP + 3EA)^2}{16(IP - EA)} \quad (S5)$$

According to Marcus theory, the reorganization energy can usually be adopted to predict the molecular transport capacity. The organization energy consists of  $\lambda_h$  (the reorganization energy of the hole) and  $\lambda_e$  (the reorganization energy of the electron) [4, 5]:

$$\lambda_h = E_0^+ - E_+ + E_+^0 - E_0 \quad (\text{S6})$$

$$\lambda_e = E_0^- - E_- + E_-^0 - E_0 \quad (\text{S7})$$

Where  $E_0^+$  ( $E_0^-$ ) stands for the energy of cation (anion) under the neutral structure,  $E_+$  ( $E_-$ ) means the energy after optimizing the structure of anion/cation,  $E_+^0$  ( $E_-^0$ ) is the neutral energy calculated based on the ion geometry structure, and  $E_0$  represents the neutral structure energy.

### S.1.2. D/A interface charge transfer performance

Based on Marcus theory, the values of charge reorganization rate  $K_{\text{CR}}$  and exciton separation rate  $K_{\text{CS}}$  can be obtained through electronic coupling ( $V_{\text{DA}}$ ) and reorganization energy ( $\lambda$ ), Gibbs free energy change ( $\Delta G$ ). The detailed calculation process of these parameters is as follows.

$V_{\text{DA}}$  indicates the charge transfer integral, which may be evaluated by utilizing the recognized Mulliken-Hush model of two states [6-9]:

$$V_{\text{DA}} = \frac{\mu_{\text{tr}} \Delta E}{\sqrt{(\Delta \mu)^2 + 4(\mu_{\text{tr}})^2}} \quad (\text{S8})$$

where  $\mu_{\text{tr}}$  is the transition dipole moment, which can be assessed by the electron dipole moment of the initial state and the complete ICT state [6]:

$$\mu_{\text{tr}} = \sqrt{x^2 + y^2 + z^2} \quad (\text{S9})$$

$\Delta E$  represents the ICT state's vertical excitation energy, and  $\Delta \mu$  reflects the dipole moment difference, which is usually evaluated through the finite field difference method under the Hellmann-Feynman theorem [10]:

$$E_{\text{ext}}(F) = E_{\text{ext}}(0) - \Delta \mu F - \frac{1}{2} \Delta \alpha F^2 \quad (\text{S10})$$

here  $E$  is the excitation energy. The  $F$  and 0 donate the electrostatic field and zero-electric field respectively. The  $\Delta \alpha$  is the change rate of polarizability.

The recombination energy of an interface includes both external recombination energy  $\lambda_o$  and internal recombination energy  $\lambda_i$ . Because  $\lambda_o$  is challenging to be calculated theoretically, a value of 0.3 eV is used here for the results of the recombination energy study in the experiment [11]. The expression for the  $\lambda_i$  of the interface is as follows [4, 12]:

$$\lambda_1 = E_0^+(\text{D}) - E_+(\text{D}) + E_-(\text{A}) - E_0(\text{A}) \quad (\text{S11})$$

where  $E_0^+(\text{D})$  means the neutral structural energy of the donor molecule carrying a positive charge,  $E_+(\text{D})$  is the optimized donor cation structural energy,  $E_-(\text{A})$  refers to the energy of the anion structure of the acceptor without charge, and  $E_0(\text{A})$  is the neutral acceptor's energy.

The changes in free energy during charge recombination and exciton separation are denoted as  $\Delta G_{\text{CR}}$  and  $\Delta G_{\text{CS}}$ , respectively. The expression of  $\Delta G_{\text{CR}}$  has been shown below [13]:

$$\Delta G_{\text{CR}} = E_{\text{IP}}(\text{D}) - E_{\text{EA}}(\text{A}) \quad (\text{S12})$$

The equation of  $\Delta G_{\text{CS}}$  is as follows [14]:

$$\Delta G_{\text{CS}} = -\Delta G_{\text{CR}} - E_{\text{D1}} + E_{\text{C}} \quad (\text{S13})$$

where  $E_{\text{D1}}$  refers to the excitation energy of the donor molecular lowest singlet state, and  $E_{\text{C}}$  represents the Coulomb interaction energy of the ICT state.

Coulomb attraction energy ( $E_{\text{C}}$ ) can be obtained by Multiwfn software [15, 16], which is based on the under-expression (atomic unit system) [17, 18]:

$$E_{\text{C}} = \iint \frac{\rho^{\text{hole}}(r_1)\rho^{\text{ele}}(r_2)}{|r_1 - r_2|} dr_1 dr_2 \quad (\text{S14})$$

Where  $\rho^{\text{ele}}$  and  $\rho^{\text{hole}}$  represent the electron and hole density of the transition orbitals, separately, and  $r_1$  and  $r_2$  are the charges' coordinates.

## Section S.2. Supporting Tables

**Table S1.** Statistics of bond length (Å) and dihedral angle (°) of the investigated donor molecules.

| Molecules | d <sub>1</sub> (Å) | d <sub>2</sub> (Å) | d <sub>3</sub> (Å) | θ <sub>1</sub> (°) | θ <sub>2</sub> (°) | θ <sub>3</sub> (°) |
|-----------|--------------------|--------------------|--------------------|--------------------|--------------------|--------------------|
| ZnChl-1   | 1.43               | 1.43               | 1.22               | 6.16               | 110.22             | 0.91               |
| B-ZnChl-1 | 1.54               | 1.43               | 1.23               | -23.68             | 89.36              | 14.16              |
| C-ZnChl-1 | 1.53               | 1.44               | 1.23               | -22.59             | -89.60             | 12.99              |
| D-ZnChl-1 | 1.50               | 1.43               | 1.23               | 10.28              | 94.04              | 0.55               |
| T-ZnChl-1 | 1.58               | 1.44               | 1.23               | -17.53             | -83.60             | 13.69              |

**Table S2.** Molecular overall surface area, positive surface area, extreme value of ESP, total average ESP, molecular polarity index (MPI) and polar surface area of ZnChl-1, B-ZnChl-1, C-ZnChl-1, D-ZnChl-1 and T-ZnChl-1 (isosurface=0.001 a.u.).

| Molecules                                        | ZnChl-1 | B-ZnChl-1 | C-ZnChl-1 | D-ZnChl-1 | T-ZnChl-1 |
|--------------------------------------------------|---------|-----------|-----------|-----------|-----------|
| Overall surface area<br>/Å <sup>2</sup>          | 671.93  | 710.99    | 710.28    | 752.11    | 791.84    |
| Positive surface area<br>/Å <sup>2</sup>         | 392.83  | 410.74    | 416.09    | 439.73    | 442.33    |
| Minimal value<br>/kcal mol <sup>-1</sup>         | -49.40  | -48.07    | -48.68    | -50.01    | -50.06    |
| Maximal value<br>/kcal mol <sup>-1</sup>         | 52.21   | 51.42     | 55.69     | 53.15     | 50.04     |
| Overall average value<br>/kcal mol <sup>-1</sup> | 1.43    | 1.09      | 0.84      | 1.12      | 0.76      |
| MPI<br>/kcal mol <sup>-1</sup>                   | 13.16   | 11.66     | 11.99     | 12.63     | 10.08     |
| Polar surface area<br>( ESP >10 kcal/mol)<br>/%  | 50.35   | 46.51     | 46.01     | 49.80     | 40.73     |

**Table S3.** The calculated excited state transition energy, oscillator strength  $f$  and main transition configuration of the ZnChl-1 molecule.

| Molecules | State           | Transition energy (eV/nm) | Strength $f$ | Contribution MOs |
|-----------|-----------------|---------------------------|--------------|------------------|
| ZnChl-1   | S <sub>1</sub>  | 2.029/611.22              | 0.3809       | H→L/0.65199      |
|           | S <sub>2</sub>  | 2.343/529.16              | 0.2059       | H-1→L/0.62336    |
|           | S <sub>3</sub>  | 3.247/381.82              | 1.2783       | H→L+1/0.61650    |
|           | S <sub>4</sub>  | 3.415/363.06              | 1.5148       | H-1→L+1/0.62547  |
|           | S <sub>5</sub>  | 3.682/336.78              | 0.0315       | H-3→L/0.39306    |
|           | S <sub>6</sub>  | 3.725/332.84              | 0.0098       | H-3→L/0.53541    |
|           | S <sub>7</sub>  | 3.789/327.19              | 0.0012       | H-6→L/0.53788    |
|           | S <sub>8</sub>  | 3.961/313.05              | 0.2284       | H-5→L/0.45890    |
|           | S <sub>9</sub>  | 4.094/302.85              | 0.0119       | H-8→L/0.54861    |
|           | S <sub>10</sub> | 4.127/300.45              | 0.0648       | H→L+2/0.48369    |

**Table S4.** The calculated excited state transition energy, oscillator strength  $f$  and main transition configuration of the B-ZnChl-1 molecule.

| Molecules | State           | Transition energy (eV/nm) | Strength $f$ | Contribution MOs |
|-----------|-----------------|---------------------------|--------------|------------------|
| B-ZnChl-1 | S <sub>1</sub>  | 2.042/607.21              | 0.3706       | H→L/0.66401      |
|           | S <sub>2</sub>  | 2.419/512.45              | 0.1116       | H-1→L/ 0.61918   |
|           | S <sub>3</sub>  | 3.295/376.26              | 1.3457       | H→L+1/0.62130    |
|           | S <sub>4</sub>  | 3.537/350.53              | 1.2506       | H-1→L+1/0.62161  |
|           | S <sub>5</sub>  | 3.655/339.27              | 0.0586       | H-2→L/0.42650    |
|           | S <sub>6</sub>  | 3.703/334.78              | 0.0228       | H-2→L/0.49600    |
|           | S <sub>7</sub>  | 3.733/332.16              | 0.0064       | H-4→L/0.51503    |
|           | S <sub>8</sub>  | 3.780/328.01              | 0.0071       | H-7→L/0.54596    |
|           | S <sub>9</sub>  | 4.040/306.90              | 0.0129       | H-10→L/0.42933   |
|           | S <sub>10</sub> | 4.052/305.97              | 0.3004       | H-6→L/0.60611    |



**Table S5.** The calculated excited state transition energy, oscillator strength  $f$  and main transition configuration of the C-ZnChl-1 molecule.

| Molecules | State           | Transition energy (eV/nm) | Strength $f$ | Contribution MOs |
|-----------|-----------------|---------------------------|--------------|------------------|
| C-ZnChl-1 | S <sub>1</sub>  | 2.049/605.20              | 0.3519       | H→L/0.66136      |
|           | S <sub>2</sub>  | 2.398/517.04              | 0.0922       | H-1→L/0.61695    |
|           | S <sub>3</sub>  | 3.285/377.44              | 1.2884       | H→L+1/0.61692    |
|           | S <sub>4</sub>  | 3.515/352.72              | 1.2532       | H-1→L+1/0.64054  |
|           | S <sub>5</sub>  | 3.698/335.25              | 0.0425       | H-5→L/ 0.54115   |
|           | S <sub>6</sub>  | 3.774/328.54              | 0.0153       | H-4→L/0.58174    |
|           | S <sub>7</sub>  | 3.796/326.66              | 0.0038       | H-7→L/0.54145    |
|           | S <sub>8</sub>  | 3.905/317.53              | 0.0059       | H-2→L/0.61290    |
|           | S <sub>9</sub>  | 3.999/310.15              | 0.0371       | H-3→L/0.50643    |
|           | S <sub>10</sub> | 4.070/304.66              | 0.0665       | H-10→L/0.42318   |

**Table S6.** The calculated excited state transition energy, oscillator strength  $f$  and main transition configuration of the D-ZnChl-1 molecule.

| Molecules | State           | Transition energy (eV/nm) | Strength $f$ | Contribution MOs |
|-----------|-----------------|---------------------------|--------------|------------------|
| D-ZnChl-1 | S <sub>1</sub>  | 2.052/604.23              | 0.3645       | H→L/0.66052      |
|           | S <sub>2</sub>  | 2.395/517.72              | 0.0920       | H-1→L/0.61578    |
|           | S <sub>3</sub>  | 3.288/377.09              | 1.3874       | H→L+1/0.61571    |
|           | S <sub>4</sub>  | 3.515/352.77              | 1.4051       | H-1→L+1/0.63811  |
|           | S <sub>5</sub>  | 3.727/332.70              | 0.0350       | H-4→L/0.54649    |
|           | S <sub>6</sub>  | 3.773/328.64              | 0.0029       | H-6→L/0.50463    |
|           | S <sub>7</sub>  | 3.781/327.90              | 0.0077       | H-3→L/0.53904    |
|           | S <sub>8</sub>  | 4.027/307.91              | 0.6017       | H-5→L/0.33568    |
|           | S <sub>9</sub>  | 4.074/304.35              | 0.0601       | H-9→L/0.49946    |
|           | S <sub>10</sub> | 4.122/300.79              | 0.0662       | H-5→L/0.50850    |

**Table S7.** The calculated excited state transition energy, oscillator strength  $f$  and main transition configuration of the T-ZnChl-1 molecule.

| Molecules | State           | Transition energy (eV/nm) | Strength $f$ | Contribution MOs |
|-----------|-----------------|---------------------------|--------------|------------------|
| T-ZnChl-1 | S <sub>1</sub>  | 2.040/607.66              | 0.3517       | H→L/ 0.66072     |
|           | S <sub>2</sub>  | 2.388/519.23              | 0.0965       | H-1→L/0.59313    |
|           | S <sub>3</sub>  | 3.267/379.47              | 1.2464       | H→L+1/0.60767    |
|           | S <sub>4</sub>  | 3.474/356.90              | 0.6677       | H-2→L/0.47584    |
|           | S <sub>5</sub>  | 3.530/351.29              | 0.5854       | H-1→L+1/0.48692  |
|           | S <sub>6</sub>  | 3.708/334.33              | 0.0359       | H-4→L/0.55927    |
|           | S <sub>7</sub>  | 3.771/328.80              | 0.0183       | H-3→L/0.55134    |
|           | S <sub>8</sub>  | 3.787/327.41              | 0.0012       | H-7→L/0.46512    |
|           | S <sub>9</sub>  | 4.038/307.04              | 0.0170       | H-10→L/0.52731   |
|           | S <sub>10</sub> | 4.089/303.22              | 0.2482       | H-5→L/0.58496    |

**Table S8.** The HOMO, LUMO levels and energy gaps (in eV) of the D/A complexes.

|              | HOMO (eV) | LUMO (eV) | $\Delta_{\text{H-L}}$ (eV) |
|--------------|-----------|-----------|----------------------------|
| ZnChl-1/Y6   | -4.97     | -3.42     | 1.55                       |
| B-ZnChl-1/Y6 | -5.05     | -3.40     | 1.65                       |
| C-ZnChl-1/Y6 | -4.98     | -3.40     | 1.58                       |
| D-ZnChl-1/Y6 | -5.00     | -3.38     | 1.62                       |
| T-ZnChl-1/Y6 | -4.94     | -3.41     | 1.53                       |

**Table S9.** The calculated excited state transition energy, oscillator strength  $f$  and main transition configuration of the ZnChl-1/Y6 interface.

| Molecules  | State           | Transition energy (eV/nm) | Strength $f$ | Contribution MOs |
|------------|-----------------|---------------------------|--------------|------------------|
| ZnChl-1/Y6 | S <sub>1</sub>  | 2.022/613.05              | 0.3046       | H→L+2/0.64459    |
|            | S <sub>2</sub>  | 2.077/597.04              | 2.3195       | H-2→L/0.62463    |
|            | S <sub>3</sub>  | 2.335/530.93              | 0.0051       | H→L/0.64090      |
|            | S <sub>4</sub>  | 2.339/530.07              | 0.3181       | H-1→L+2/0.60546  |
|            | S <sub>5</sub>  | 2.535/489.09              | 0.3181       | H-2→L+1/0.55639  |
|            | S <sub>6</sub>  | 2.573/481.86              | 0.0031       | H-1→L/0.57914    |
|            | S <sub>7</sub>  | 2.771/447.36              | 0.0000       | H-1→L+2/0.60546  |
|            | S <sub>8</sub>  | 3.003/412.81              | 0.0000       | H-1→L+1/0.67005  |
|            | S <sub>9</sub>  | 3.085/401.94              | 0.0349       | H-2→L+3/0.53011  |
|            | S <sub>10</sub> | 3.169/391.26              | 0.0546       | H-2→L+4/0.49387  |

**Table S10.** The calculated excited state transition energy, oscillator strength  $f$  and main transition configuration of the B-ZnChl-1/Y6 interface.

| Molecules    | State           | Transition energy (eV/nm) | Strength $f$ | Contribution MOs |
|--------------|-----------------|---------------------------|--------------|------------------|
| B-ZnChl-1/Y6 | S <sub>1</sub>  | 2.021/613.37              | 0.4437       | H→L+2/0.52615    |
|              | S <sub>2</sub>  | 2.067/599.71              | 2.2350       | H-2→L/0.50101    |
|              | S <sub>3</sub>  | 2.304/538.18              | 0.0004       | H→L/0.68892      |
|              | S <sub>4</sub>  | 2.424/511.59              | 0.1051       | H-1→L+2/0.61199  |
|              | S <sub>5</sub>  | 2.513/493.31              | 0.5481       | H-2→L+1/0.55208  |
|              | S <sub>6</sub>  | 2.674/463.66              | 0.0004       | H-1→L/0.60440    |
|              | S <sub>7</sub>  | 2.760/449.30              | 0.0007       | H→L+1/0.60041    |
|              | S <sub>8</sub>  | 3.045/407.15              | 0.0010       | H-1→L+1/0.49997  |
|              | S <sub>9</sub>  | 3.064/404.59              | 0.0256       | H-2→L+3/0.53234  |
|              | S <sub>10</sub> | 3.143/394.51              | 0.0549       | H-2→L+4/0.49342  |

**Table S11.** The calculated excited state transition energy, oscillator strength  $f$  and main transition configuration of the C-ZnChl-1/Y6 interface.

| Molecules    | State           | Transition energy (eV/nm) | Strength $f$ | Contribution MOs |
|--------------|-----------------|---------------------------|--------------|------------------|
| C-ZnChl-1/Y6 | S <sub>1</sub>  | 2.036/609.04              | 0.3855       | H→L+2/0.54448    |
|              | S <sub>2</sub>  | 2.080/596.13              | 2.3181       | H-2→L/0.52004    |
|              | S <sub>3</sub>  | 2.280/543.72              | 0.0013       | H→L/0.68385      |
|              | S <sub>4</sub>  | 2.405/515.49              | 0.0835       | H-1→L+2/0.61550  |
|              | S <sub>5</sub>  | 2.517/492.68              | 0.5748       | H-2→L+1/0.55632  |
|              | S <sub>6</sub>  | 2.646/468.55              | 0.0006       | H-1→L/0.64876    |
|              | S <sub>7</sub>  | 2.725/454.93              | 0.0002       | H→L+1/0.63424    |
|              | S <sub>8</sub>  | 3.053/406.14              | 0.0007       | H-1→L+1/0.68654  |
|              | S <sub>9</sub>  | 3.079/402.77              | 0.0168       | H-2→L+3/0.53227  |
|              | S <sub>10</sub> | 3.165/391.80              | 0.0436       | H-2→L+4/0.48681  |

**Table S12.** The calculated excited state transition energy, oscillator strength  $f$  and main transition configuration of the D-ZnChl-1/Y6 interface.

| Molecules    | State           | Transition energy (eV/nm) | Strength $f$ | Contribution MOs |
|--------------|-----------------|---------------------------|--------------|------------------|
| D-ZnChl-1/Y6 | S <sub>1</sub>  | 2.020/613.75              | 0.2356       | H→L+2/0.554040   |
|              | S <sub>2</sub>  | 2.085/594.68              | 2.5633       | H-2→L/0.551503   |
|              | S <sub>3</sub>  | 2.336/530.71              | 0.0001       | H→L/0.67854      |
|              | S <sub>4</sub>  | 2.392/518.39              | 0.0646       | H-1→L+2/0.61800  |
|              | S <sub>5</sub>  | 2.515/492.97              | 0.5010       | H-2→L+1/0.55538  |
|              | S <sub>6</sub>  | 2.682/462.29              | 0.0002       | H-1→L/0.60430    |
|              | S <sub>7</sub>  | 2.763/448.68              | 0.0000       | H→L+1/0.58827    |
|              | S <sub>8</sub>  | 3.065/404.53              | 0.0156       | H-2→L+3/0.53519  |
|              | S <sub>9</sub>  | 3.089/401.44              | 0.0002       | H-1→L+1/0.68562  |
|              | S <sub>10</sub> | 3.157/392.69              | 0.0360       | H-2→L+4/0.45003  |



**Table S13.** The calculated excited state transition energy, oscillator strength  $f$  and main transition configuration of the T-ZnChl-1/Y6 interface.

| Molecules    | State           | Transition energy(eV/nm) | Strength $f$ | Contribution MOs |
|--------------|-----------------|--------------------------|--------------|------------------|
| T-ZnChl-1/Y6 | S <sub>1</sub>  | 2.033/609.88             | 0.1951       | H→L+2/0.60936    |
|              | S <sub>2</sub>  | 2.075/597.41             | 2.4504       | H-2→L/0.57710    |
|              | S <sub>3</sub>  | 2.190/566.11             | 0.0379       | H→L+1/0.68628    |
|              | S <sub>4</sub>  | 2.391/518.62             | 0.0909       | H-2→L+2/0.58529  |
|              | S <sub>5</sub>  | 2.515/493.07             | 0.3774       | H-3→L+1/0.46419  |
|              | S <sub>6</sub>  | 2.529/490.28             | 0.1531       | H-1→L/0.54315    |
|              | S <sub>7</sub>  | 2.614/474.24             | 0.0020       | H→L+1/0.63981    |
|              | S <sub>8</sub>  | 2.798/443.10             | 0.0007       | H-3→L/0.58092    |
|              | S <sub>9</sub>  | 2.993/414.29             | 0.0020       | H-1→L+1/0.61962  |
|              | S <sub>10</sub> | 3.070/403.90             | 0.0278       | H-2→L+3/0.53007  |

**Table S14.** The charge transfer distance ( $\Delta d$ ), transfer charge value ( $\Delta q$ ), t index, Sr index and excited state property of important excited states of ZnChl-1/Y6 interfaces.

| Molecule   | State           | $\Delta d$ (Å) | $\Delta q$ (e) | t index (Å) | Sr index (a.u.) | Property        |
|------------|-----------------|----------------|----------------|-------------|-----------------|-----------------|
| ZnChl-1/Y6 | S <sub>1</sub>  | 0.155          | -0.001         | -2.653      | 0.8680          | FE <sub>1</sub> |
|            | S <sub>2</sub>  | 0.652          | 0.001          | -1.747      | 0.7464          | FE <sub>2</sub> |
|            | S <sub>3</sub>  | 5.099          | 0.954          | 2.733       | 0.2064          | CT <sub>1</sub> |
|            | S <sub>4</sub>  | 0.951          | 0.043          | -1.989      | 0.8673          | FE <sub>3</sub> |
|            | S <sub>5</sub>  | 0.665          | 0.004          | -1.559      | 0.7213          | FE <sub>4</sub> |
|            | S <sub>6</sub>  | 5.583          | 0.995          | 3.013       | 0.0794          | CT <sub>2</sub> |
|            | S <sub>7</sub>  | 5.445          | 0.999          | 2.759       | 0.0294          | CT <sub>3</sub> |
|            | S <sub>8</sub>  | 6.222          | 0.999          | 2.326       | 0.0320          | CT <sub>4</sub> |
|            | S <sub>9</sub>  | 1.503          | -0.002         | -1.110      | 0.6564          | FE <sub>5</sub> |
|            | S <sub>10</sub> | 2.114          | 0.001          | -0.138      | 0.6784          | FE <sub>6</sub> |

**Table S15.** The charge transfer distance ( $\Delta d$ ), transfer charge value ( $\Delta q$ ), t index, Sr index and excited state property of important excited states of B-ZnChl-1/Y6 interfaces.

| Molecule     | State           | $\Delta d$ (Å) | $\Delta q$ (e) | t index (Å) | Sr index (a.u.) | Property        |
|--------------|-----------------|----------------|----------------|-------------|-----------------|-----------------|
| B-ZnChl-1/Y6 | S <sub>1</sub>  | 0.276          | 0.001          | -2.391      | 0.8171          | -               |
|              | S <sub>2</sub>  | 0.423          | 0.001          | -2.591      | 0.7889          | -               |
|              | S <sub>3</sub>  | 4.404          | 0.999          | 2.321       | 0.0561          | CT <sub>1</sub> |
|              | S <sub>4</sub>  | 0.699          | -0.002         | -2.041      | 0.8808          | FE <sub>1</sub> |
|              | S <sub>5</sub>  | 0.666          | 0.001          | -1.864      | 0.7253          | FE <sub>2</sub> |
|              | S <sub>6</sub>  | 4.395          | 0.998          | 3.001       | 0.0489          | CT <sub>2</sub> |
|              | S <sub>7</sub>  | 4.616          | 0.998          | 2.195       | 0.0405          | CT <sub>3</sub> |
|              | S <sub>8</sub>  | 5.110          | 0.989          | 2.169       | 0.1078          | CT <sub>4</sub> |
|              | S <sub>9</sub>  | 1.755          | 0.005          | -1.715      | 0.6551          | FE <sub>3</sub> |
|              | S <sub>10</sub> | 2.152          | 0.012          | -0.453      | 0.6783          | FE <sub>4</sub> |

**Table S16.** The charge transfer distance ( $\Delta d$ ), transfer charge value ( $\Delta q$ ), t index, Sr index and excited state property of important excited states of C-ZnChl-1/Y6 interfaces.

| Molecule     | State           | $\Delta d$ (Å) | $\Delta q$ (e) | t index (Å) | Sr index (a.u.) | Property        |
|--------------|-----------------|----------------|----------------|-------------|-----------------|-----------------|
| C-ZnChl-1/Y6 | S <sub>1</sub>  | 0.286          | -0.001         | -2.405      | 0.8293          | -               |
|              | S <sub>2</sub>  | 0.462          | -0.001         | -1.931      | 0.7863          | -               |
|              | S <sub>3</sub>  | 5.011          | 0.998          | 2.996       | 0.0315          | CT <sub>1</sub> |
|              | S <sub>4</sub>  | 0.585          | -0.001         | -1.976      | 0.8964          | FE <sub>1</sub> |
|              | S <sub>5</sub>  | 0.704          | 0.001          | -1.154      | 0.7206          | FE <sub>2</sub> |
|              | S <sub>6</sub>  | 4.732          | 0.999          | 3.571       | 0.0299          | CT <sub>2</sub> |
|              | S <sub>7</sub>  | 5.587          | 0.999          | 2.563       | 0.0291          | CT <sub>3</sub> |
|              | S <sub>8</sub>  | 4.719          | 0.998          | 3.053       | 0.0604          | CT <sub>4</sub> |
|              | S <sub>9</sub>  | 1.786          | 0.001          | -2.196      | 0.6572          | FE <sub>3</sub> |
|              | S <sub>10</sub> | 2.110          | 0.004          | -0.458      | 0.6895          | FE <sub>4</sub> |

**Table S17.** The charge transfer distance ( $\Delta d$ ), transfer charge value ( $\Delta q$ ), t index, Sr index and excited state property of important excited states of D-ZnChl-1/Y6 interfaces.

| Molecule     | State           | $\Delta d$ (Å) | $\Delta q$ (e) | t index (Å) | Sr index (a.u.) | Property        |
|--------------|-----------------|----------------|----------------|-------------|-----------------|-----------------|
| D-ZnChl-1/Y6 | S <sub>1</sub>  | 0.287          | -0.001         | -2.342      | 0.8229          | -               |
|              | S <sub>2</sub>  | 0.518          | -0.000         | -3.487      | 0.7876          | -               |
|              | S <sub>3</sub>  | 5.011          | 0.998          | 2.996       | 0.0315          | CT <sub>1</sub> |
|              | S <sub>4</sub>  | 0.585          | -0.001         | -1.976      | 0.8964          | FE <sub>1</sub> |
|              | S <sub>5</sub>  | 0.704          | 0.001          | -1.154      | 0.7206          | FE <sub>2</sub> |
|              | S <sub>6</sub>  | 4.732          | 0.999          | 3.571       | 0.0299          | CT <sub>2</sub> |
|              | S <sub>7</sub>  | 5.587          | 0.999          | 2.563       | 0.0291          | CT <sub>3</sub> |
|              | S <sub>8</sub>  | 4.719          | 0.998          | 3.053       | 0.0604          | CT <sub>4</sub> |
|              | S <sub>9</sub>  | 1.786          | 0.001          | -2.196      | 0.6572          | FE <sub>3</sub> |
|              | S <sub>10</sub> | 2.110          | 0.004          | -0.458      | 0.6895          | FE <sub>4</sub> |

**Table S18.** The charge transfer distance ( $\Delta d$ ), transfer charge value ( $\Delta q$ ), t index, Sr index and excited state property of important excited states of T-ZnChl-1/Y6 interfaces.

| Molecule     | State           | $\Delta d$ (Å) | $\Delta q$ (e) | t index (Å) | Sr index (a.u.) | Property        |
|--------------|-----------------|----------------|----------------|-------------|-----------------|-----------------|
| T-ZnChl-1/Y6 | S <sub>1</sub>  | 0.150          | -0.001         | -2.686      | 0.8522          | -               |
|              | S <sub>2</sub>  | 0.583          | 0.012          | -1.642      | 0.7608          | -               |
|              | S <sub>3</sub>  | 3.978          | 0.988          | 2.395       | 0.1303          | CT <sub>1</sub> |
|              | S <sub>4</sub>  | 0.601          | -0.003         | -2.082      | 0.8921          | FE <sub>1</sub> |
|              | S <sub>5</sub>  | 1.201          | 0.286          | -0.979      | 0.6707          | -               |
|              | S <sub>6</sub>  | 3.111          | 0.727          | 1.300       | 0.4448          | CT <sub>2</sub> |
|              | S <sub>7</sub>  | 3.939          | 0.996          | 2.683       | 0.0814          | CT <sub>3</sub> |
|              | S <sub>8</sub>  | 6.403          | 0.998          | 3.796       | 0.0505          | CT <sub>4</sub> |
|              | S <sub>9</sub>  | 4.774          | 0.998          | 1.185       | 0.0622          | CT <sub>5</sub> |
|              | S <sub>10</sub> | 1.612          | 0.001          | -1.145      | 0.6587          | FE <sub>2</sub> |

*Section S.3. Supporting Figures*

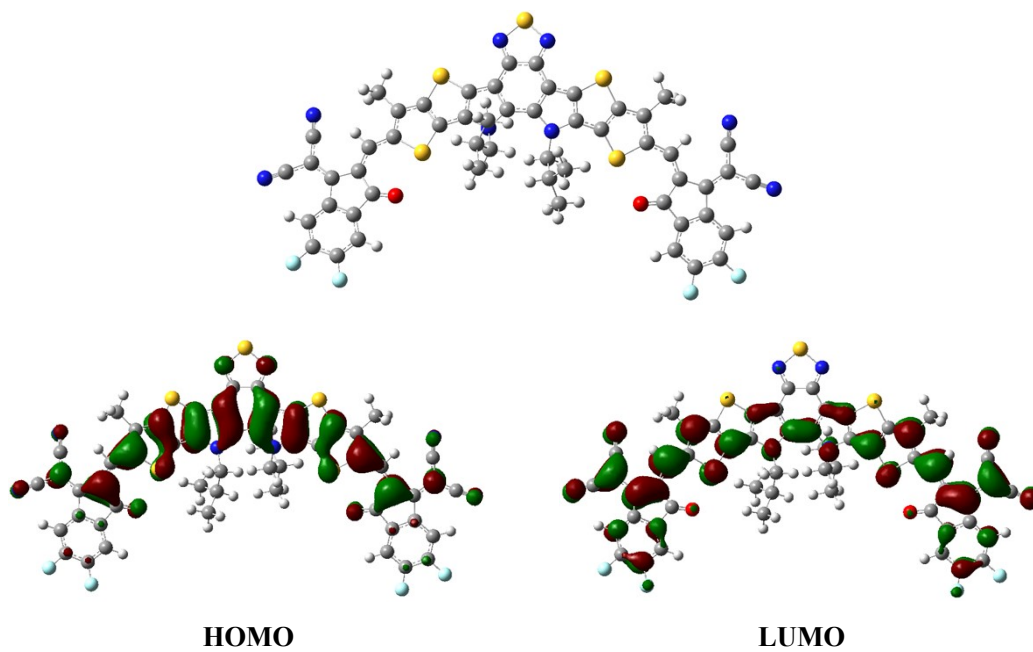

**Figure S1.** The optimized structure and frontier molecular orbitals (FMOs) of Y6 acceptor.

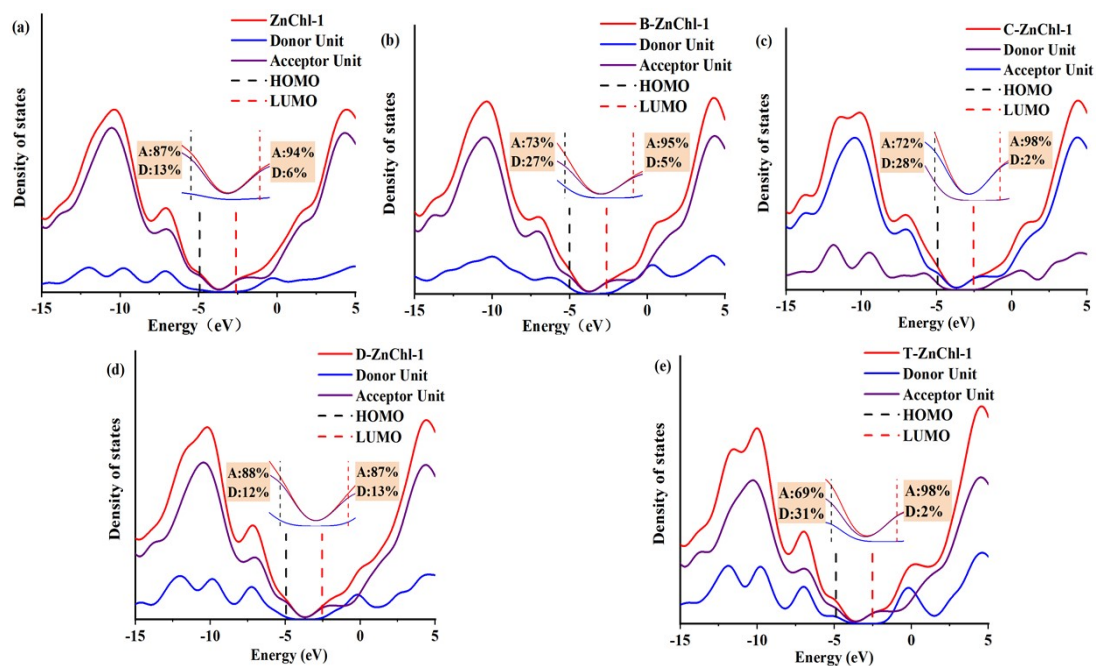

**Figure S2.** Density of states (DOS) of donor molecules ZnChl-1, B-ZnChl-1, C-ZnChl-1, D-ZnChl-1, T-ZnChl-1 (the percentage indicated is the contribution rate of donor unit (D) and acceptor unit (A) to HOMO and LUMO orbitals respectively).



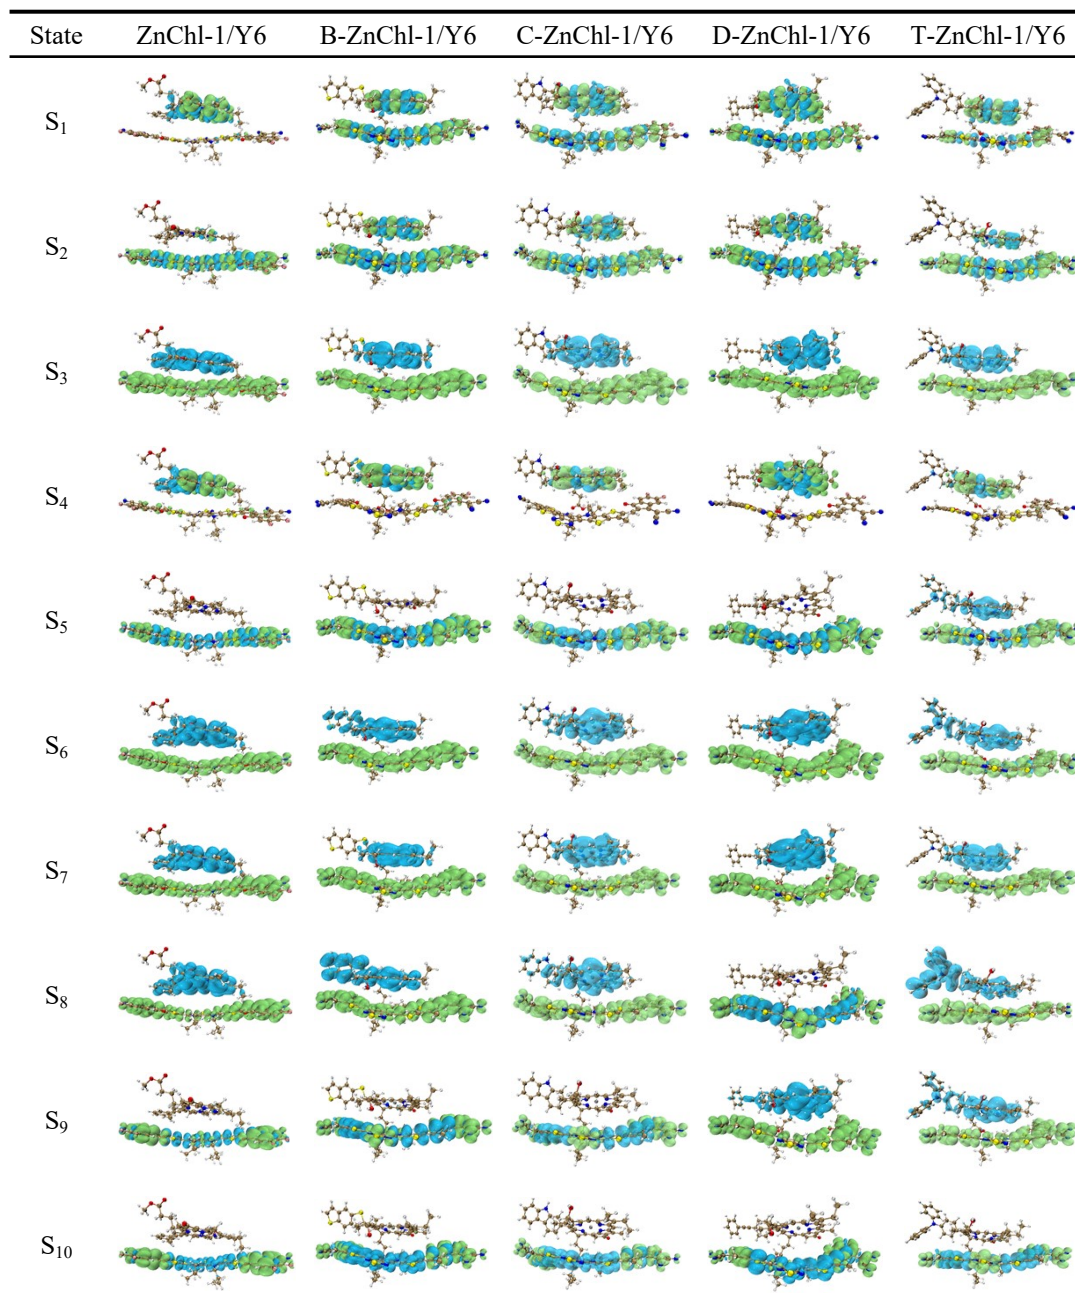

**Figure S3.** Charge differential density (CDD) of all D/A interfaces.

## References of Supporting

- [1] Zhou B, Hu Z, Jiang Y, He X, Sun Z and Sun H. Benchmark study of ionization potentials and electron affinities of armchair single-walled carbon nanotubes using density functional theory. *Journal of Physics Condensed Matter* **2018**, 30, 215501.
- [2] Ompong D and Singh J. High Open-Circuit Voltage in Perovskite Solar Cells: The Role of Hole Transport Layer. *Organic Electronics*. **2018**, 63, 104-108.
- [3] Chattaraj PK, Sarkar U and Roy DR. Electrophilicity index. *Chemical Reviews*. **2006**, 106, 2065-2091.
- [4] Koese ME, Mitchell WJ, Kopidakis N, Chang CH, Shaheen SE, Kim K and Rumbles G. Theoretical studies on conjugated phenyl-cored thiophene dendrimers for photovoltaic applications. *Journal of the American Chemical Society*. **2007**, 129, 14257-14270.
- [5] Wang QG, Zeng ZY, Li YZ and Chen XR. Efficient strategies for improving the performance of EDOT derivatives and TPA derivatives-based hole transport materials for perovskite solar cells. *Solar energy*. **2020**, 208, 10-19.
- [6] Cave RJ and Newton MD. Generalization of the Mulliken-Hush treatment for the calculation of electron transfer matrix elements. *Chemical Physics Letters*. **1996**, 249, 15-19.
- [7] Liu XJ, Shao YY, Lu T, Chang DP, Li MJ and Lu WC. Accelerating the discovery of high-performance donor/acceptor pairs in photovoltaic materials via machine learning and density functional theory. *Materials & Design*. **2022**, 216, 110561.
- [8] Cossi M, Rega N, Scalmani G and Barone V. Energies, structures, and electronic properties of molecules in solution with the C-PCM solvation model. *Journal of Computational Chemistry*. **2003**, 6, 669-681.
- [9] Biswas S, Pramanik A, Pal S and Sarkar P. A theoretical perspective on the photovoltaic performance of S,N-heteroacenes: An even-odd effect on the charge separation dynamics. *Journal of Physical Chemistry C*. **2017**, 121, 2574-2587.
- [10] Zang ZF, Wang QG, Song P, Ma FC and Li YZ. Charge transfer processes via tandem modification of efficient non-fullerene acceptors for organic solar cells. *Solar Energy*. **2022**, 231, 503-515.
- [11] McMahon DP and Troisi A. Evaluation of the external reorganization energy of polyacenes. *Journal of Physical Chemistry Letters*. **2010**, 1, 941-946.
- [12] Kose ME and Schanze KS. Prediction of Internal reorganization energy in photoinduced electron transfer processes of molecular dyads. *Journal of Physical Chemistry A*. **2020**, 124, 9478-9486.
- [13] Zhao HF, Yin H, Liu XC, Li H, Shi Y, Liu CL, Jin MX, Gao JB, Luo Y and Ding DJ. Pressure-induced tunable electron transfer and auger recombination rates in CdSe/ZnS quantum dot-anthraquinone complexes. *Journal of Physical Chemistry Letters*. **2019**, 10, 3064-3070.
- [14] Shen FG, Peng AD, Chen Y, Dong Y, Jiang ZW, Wang YB, Fu HB and Yao JN. Photoinduced electron transfer in coaggregates of dicyanonaphthalene and pyrazoline. *Journal of Physical Chemistry A*. **2008**, 112, 2206-2210.
- [15] Lu T and Chen FW. Multiwfn: A multifunctional wavefunction analyzer. *Journal of*

- Computational Chemistry*. **2012**, 33, 580-592.
- [16] Lu T and Chen FW. Quantitative analysis of molecular surface based on improved Marching Tetrahedra algorithm. *Journal of Molecular Graphics & modelling*. **2012**, 38, 314-323.
- [17] Kraner S, Prampolini G and Cuniberti G. Exciton binding energy in molecular triads. *Journal of Physical Chemistry C*. **2017**, 121, 17088-17095.
- [18] Haroon M, Akhtar T, Khalid M, Mehmood H, Asghar MA, Baby R, Orfali R and Perveen S. Synthesis, characterization and exploration of photovoltaic behavior of hydrazide based scaffolds: a concise experimental and DFT study. *RSC Advances*. **2013**, 13, 7237-7249.
